# Supplementary material for: Genome-Wide Interaction Study of Omega-3 PUFAs and Other Fatty Acids on Inflammatory Biomarkers of Cardiovascular Health in the Framingham Heart Study
Source: Nutrients. 2017 Aug 18;9(8):900. doi: 10.3390/nu9080900 (PMC5579693; doi:10.3390/nu9080900)
Supplement: Supplementary file 1 [file nutrients-09-00900-s001.xlsx]

## Sheet: Sheet2
Summary of Eighteen Significant Interactions
chr	pos	rsid	Interaction	FA	interaction.pval	snp.beta	fa.beta	interaction.beta	snp.SE	fa.SE	interaction.SE	snp.pval	fa.pval	EAF	N	gene
1	239811390	rs16838623	il6 * ALA	ALA	4.66e-08	5.73863	-0.106881	0.896038	1.05036	0.0349967	0.163506	5.11e-08	0.00228081	0.0222627	2607	CHRM3
1	239809739	rs16832149	il6 * ALA	ALA	4.95e-08	5.72209	-0.106574	0.893835	1.04978	0.034988	0.163426	5.49e-08	0.00234219	0.0221656	2607	CHRM3
2	164019142	rs12623456	il6 * DHA	DHA	3.05e-09	9.30942	-0.443368	3.02446	1.54245	0.0509638	0.508352	1.81e-09	5.79e-18	0.016121	2607	NA
2	163900291	rs16848013	il6 * DHA	DHA	7.6e-09	9.62199	-0.445521	3.10563	1.63096	0.0512125	0.535809	4.12e-09	5.81e-18	0.0163874	2607	NA
2	163855536	rs1895656	il6 * DHA	DHA	8.75e-09	9.61383	-0.443735	3.09724	1.63503	0.0511379	0.536583	4.63e-09	7.02e-18	0.0161104	2607	NA
2	164056447	rs13422433	il6 * DHA	DHA	8.88e-09	9.3962	-0.436491	3.05741	1.60751	0.0507791	0.529911	5.69e-09	1.4e-17	0.0149735	2607	NA
3	170371857	rs7611820	mcp1 * OA	OA	5.25e-10	-2.60659	0.206074	-1.31715	0.41887	0.0880167	0.21125	5.67e-10	0.0192917	0.0724085	2605	RP11-373E16.1 CLDN11
3	170376150	rs9856712	mcp1 * OA	OA	5.87e-10	-2.61144	0.208397	-1.32021	0.421058	0.0881827	0.212345	6.46e-10	0.0181889	0.0726585	2605	RP11-373E16.3 CLDN11
7	132796323	rs17424324	icam * DPA_N6	DPA_N6	1e-08	-1.48056	0.173988	-0.295335	0.261319	0.0230908	0.0513739	1.63e-08	6.7e-14	0.115718	2607	NA
7	132794130	rs17424227	icam * DPA_N6	DPA_N6	1.07e-08	-1.46261	0.173496	-0.291629	0.258484	0.0230627	0.0508211	1.7e-08	7.34e-14	0.116553	2607	NA
13	24533606	rs17079653	tnf * OA	OA	2.88e-08	-31.0199	0.300575	-15.4907	5.51636	0.0874082	2.78359	2.07e-08	0.000593292	0.0232862	2700	NA
14	49803164	rs7160151	crp * EDA	EDA	2.93e-08	7.05094	-0.721869	1.18954	1.26319	0.18108	0.213863	2.62e-08	6.89e-05	0.290015	2691	NA
14	27821399	rs17112580	cam * OA	OA	4.33e-08	-1.1379	0.265127	-0.573827	0.206531	0.0817209	0.104466	3.94e-08	0.00119201	0.24884	2665	CTD-3006G17.2
14	27810095	rs992745	cam * OA	OA	4.5e-08	1.13672	-0.881597	0.573129	0.20654	0.172318	0.104469	4.08e-08	3.34e-07	0.750457	2665	CTD-3006G17.2
14	27808931	rs7145681	cam * OA	OA	4.67e-08	1.13474	-0.880009	0.572171	0.206446	0.172239	0.104426	4.24e-08	3.46e-07	0.750211	2665	CTD-3006G17.2
20	18777980	rs3762220	crp * OA	OA	3.23e-08	10.311	-1.59583	5.21529	1.85687	0.298624	0.940532	3.08e-08	9.86e-08	0.0483846	2691	NA
20	18778101	rs3827974	crp * OA	OA	3.62e-08	10.2534	-1.59392	5.18663	1.85338	0.298629	0.9388	3.47e-08	1.02e-07	0.0483814	2691	NA
20	18778844	rs3762221	crp * OA	OA	4.54e-08	10.1368	-1.58998	5.12855	1.84596	0.29863	0.93512	4.36e-08	1.1e-07	0.0483762	2691	NA
